# Supplementary material for: Detection of Significant Association Between Variants in Cannabinoid Receptor 1 Gene (CNR1) and Personality in African–American Population
Source: PubMed Central journal article supplement (PMC6010580; doi:10.3389/fgene.2018.00199), 2018-06-14
Supplement: Presentation_1.pdf [file Presentation_1.pdf]

**Detection of significant association between variants in  
cannabinoid receptor 1 gene (*CNR1*) and personality in  
African-American population**

Yinghao Yao, Yi Xu, Junsheng Zhao, Yunlong Ma, Kunkai Su,  
Wenji Yuan, Jennie Z Ma, Thomas J Payne, and Ming D. Li

## Supplemental Figures

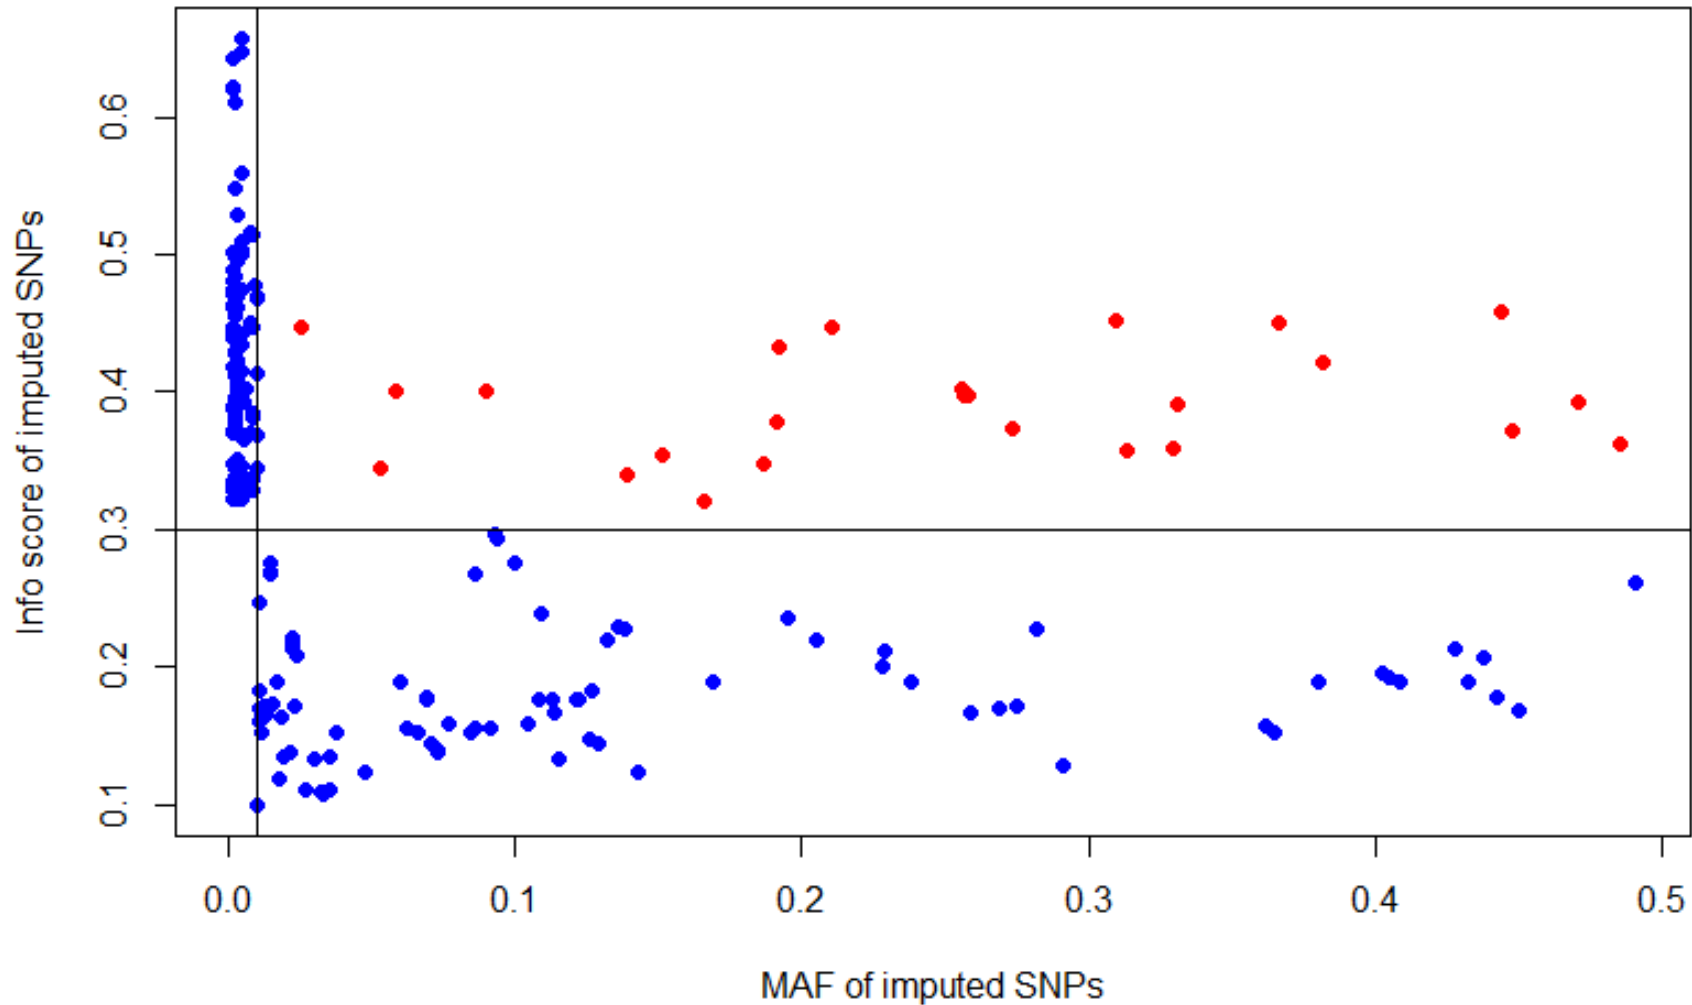

**Supplemental Figure S1:** A plot of MAF and “info” metric for 273 imputed SNPs. Red dots indicate SNPs remained for association analysis and blue dots indicate that those SNPs were removed from further analysis due to their low MAF and ‘info’ scores.

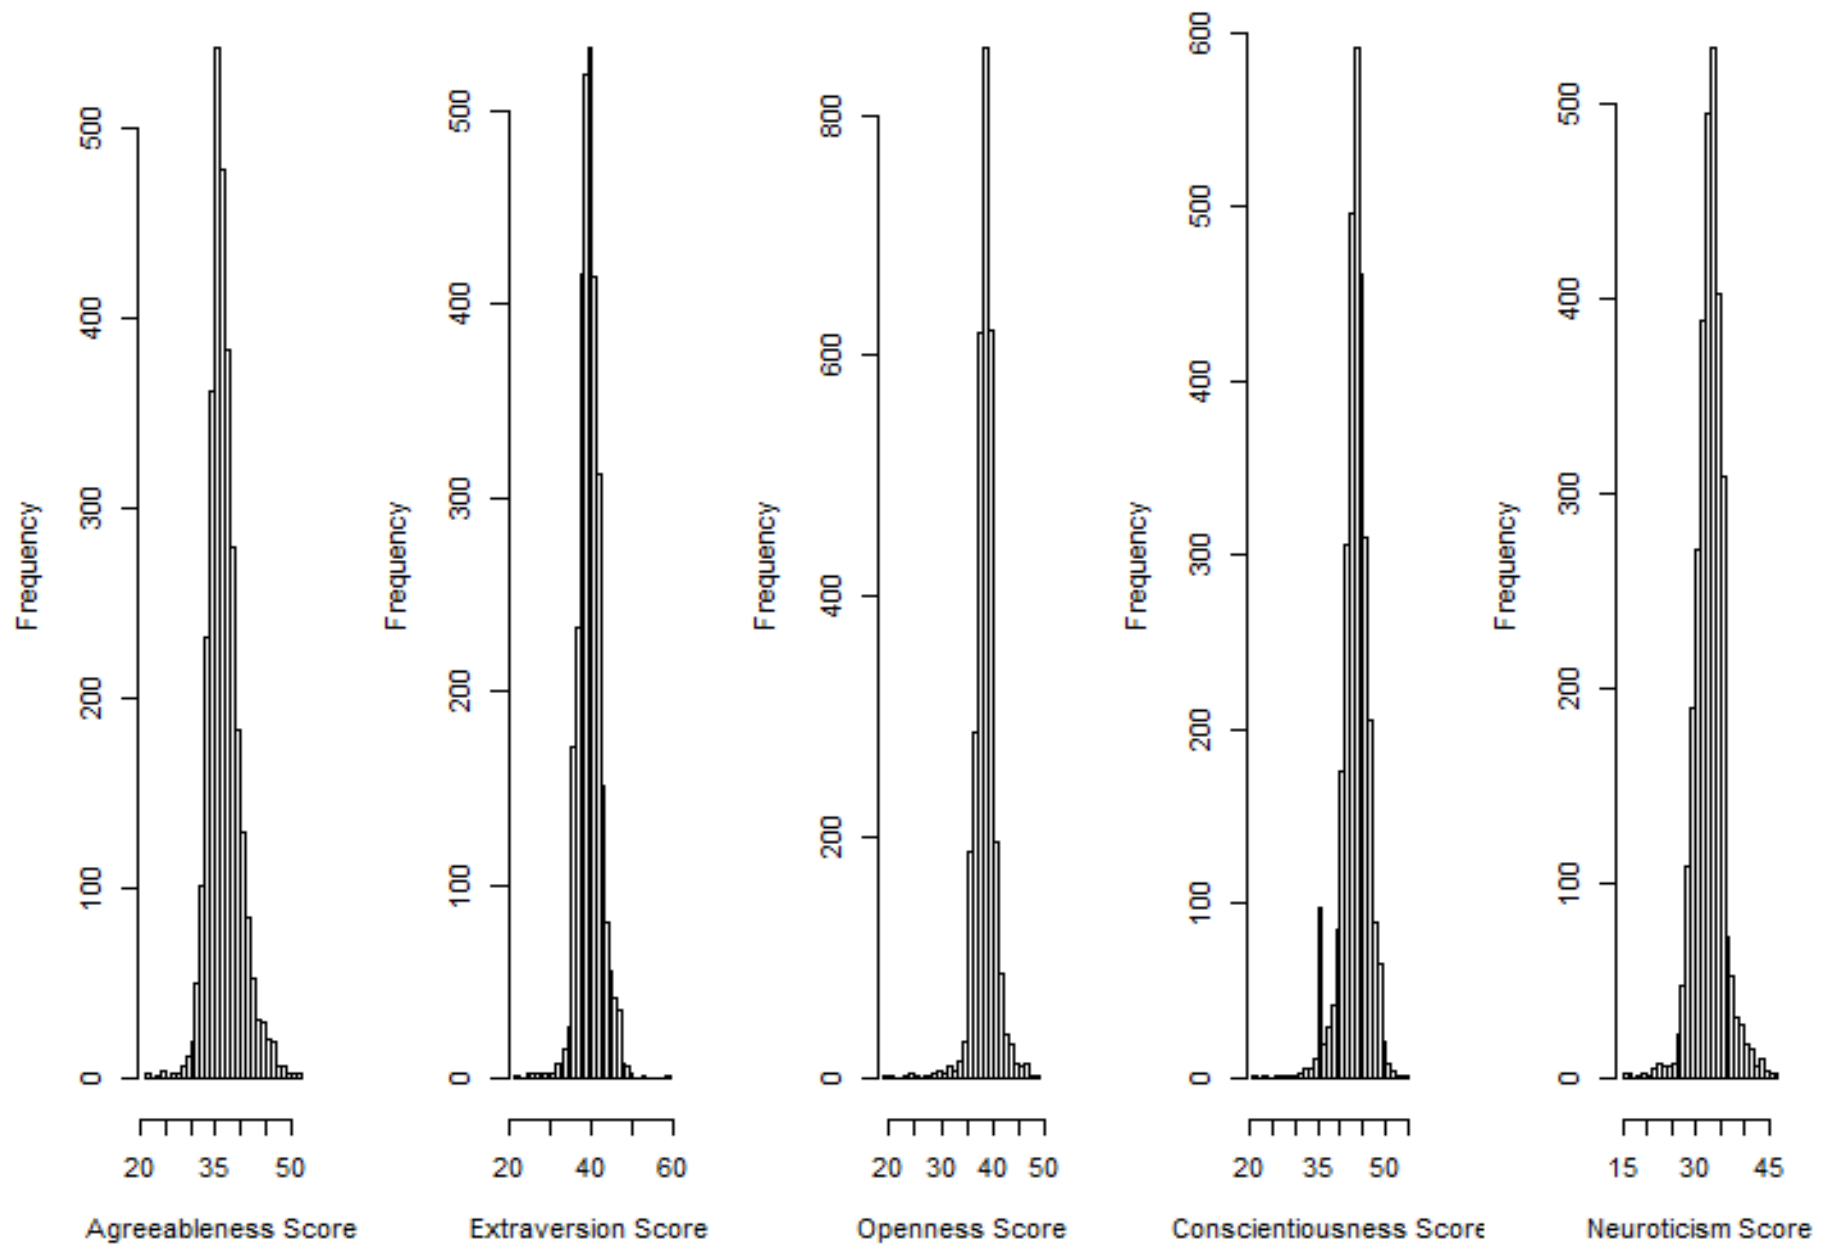

**Supplemental Figure S2:** The distributions of personality scores of five dimensions in the African-American sample used in this study.

**Supplemental Table S1: Summary information of the investigated SNPs**

| SNP ID     | Position | Ref. allele | Alt. allele | Info score | Imputed MAF | dbSNP AFR MAF | SNP Locations |
|------------|----------|-------------|-------------|------------|-------------|---------------|---------------|
| rs806366   | 88847589 | C           | T           | 0.312      | 0.186       | 0.208         | downstream    |
| rs806368   | 88850100 | T           | C           | 0.447      | 0.210       | 0.076         | 3-UTR         |
| rs12720071 | 88851181 | T           | C           | 0.355      | 0.151       | 0.177         | 3-UTR         |
| rs4707436  | 88851751 | G           | A           | 0.421      | 0.382       | 0.417         | 3-UTR         |
| rs1049353  | 88853635 | C           | T           | 0.401      | 0.058       | 0.029         | Exonic        |
| rs806369   | 88856178 | T           | C           | 0.340      | 0.139       | 0.124         | Intronic      |
| rs806370   | 88856331 | C           | T           | 0.433      | 0.192       | 0.077         | Intronic      |
| rs806371   | 88856363 | T           | G           | 0.391      | 0.331       | 0.254         | Intronic      |
| rs806372   | 88856563 | G           | C           | 0.433      | 0.192       | 0.077         | Intronic      |
| rs806373   | 88856916 | T           | A           | 0.372      | 0.448       | 0.428         | Intronic      |
| rs806374   | 88857320 | T           | C           | 0.363      | 0.485       | 0.417         | Intronic      |
| rs806376   | 88858648 | T           | C           | 0.452      | 0.309       | 0.314         | Intronic      |
| rs806378   | 88859551 | C           | T           | 0.400      | 0.090       | 0.058         | Intronic      |
| rs2023239  | 88860482 | T           | C           | 0.450      | 0.367       | 0.368         | Intronic      |
| rs1535255  | 88861208 | T           | G           | 0.373      | 0.273       | 0.372         | Intronic      |
| rs806379   | 88861267 | A           | T           | 0.392      | 0.471       | 0.442         | Intronic      |
| rs9444584  | 88862559 | C           | T           | 0.459      | 0.444       | 0.408         | Intronic      |
| rs806380   | 88864653 | A           | G           | 0.378      | 0.191       | 0.080         | Intronic      |
| rs806381   | 88865901 | A           | G           | 0.359      | 0.330       | 0.303         | Intronic      |
| rs12528858 | 88867488 | A           | G           | 0.447      | 0.025       | 0.010         | Intronic      |
| rs12205430 | 88867925 | T           | C           | 0.344      | 0.053       | 0.010         | Intronic      |
| rs6933128  | 88868830 | C           | A           | 0.320      | 0.165       | 0.140         | Intronic      |
| rs6454673  | 88871049 | G           | A           | 0.357      | 0.313       | 0.332         | Intronic      |
| rs9353526  | 88876576 | G           | T           | 0.397      | 0.256       | 0.323         | Upstream      |
| rs9362466  | 88876581 | C           | T           | 0.398      | 0.258       | 0.324         | Upstream      |
| rs2180619  | 88877952 | G           | A           | 0.365      | 0.256       | 0.326         | Promoter      |

Notes: (1) Ref allele = reference allele; Alt allele = alternate allele; Imputed MAF= imputed minor allele frequency; dbSNP AFR MAF = minor allele frequency derived from dbSNP database AFR population by 1000 Genomes.

**Supplemental Table S2: Statistical results for association analysis with Extraversion**

| SNP ID     | Position | Minor allele | MAF   | SNPTEST         |               |                 |            | PLINK           |            |
|------------|----------|--------------|-------|-----------------|---------------|-----------------|------------|-----------------|------------|
|            |          |              |       | Expected P      | Expected Beta | Score P         | Score Beta | Plink P         | Plink Beta |
| rs806366   | 88847589 | C            | 0.186 | 0.195           | -0.076        | 0.211           | -0.071     | 0.342           | -0.117     |
| rs806368   | 88850100 | C            | 0.210 | <b>1.79E-03</b> | -0.152        | <i>0.004</i>    | -0.131     | <i>0.047</i>    | -0.204     |
| rs12720071 | 88851181 | C            | 0.151 | <i>0.028</i>    | 0.133         | <i>0.027</i>    | 0.135      | 0.104           | 0.221      |
| rs4707436  | 88851751 | A            | 0.382 | 0.209           | 0.052         | 0.222           | 0.049      | 0.361           | 0.077      |
| rs1049353  | 88853635 | T            | 0.058 | 0.940           | -0.007        | 0.946           | -0.006     | 0.975           | 0.007      |
| rs806369   | 88856178 | T            | 0.139 | <i>0.016</i>    | -0.166        | <i>0.019</i>    | -0.157     | 0.217           | -0.184     |
| rs806370   | 88856331 | T            | 0.192 | <b>2.68E-04</b> | -0.184        | <b>6.62E-04</b> | -0.161     | <i>0.016</i>    | -0.261     |
| rs806371   | 88856363 | G            | 0.331 | <i>0.013</i>    | -0.109        | <i>0.017</i>    | -0.101     | <i>0.029</i>    | -0.194     |
| rs806372   | 88856563 | C            | 0.192 | <b>2.66E-04</b> | -0.184        | <b>6.58E-04</b> | -0.161     | <i>0.015</i>    | -0.264     |
| rs806373   | 88856916 | A            | 0.448 | 0.294           | -0.045        | 0.305           | -0.043     | 0.570           | -0.052     |
| rs806374   | 88857320 | C            | 0.485 | 0.481           | -0.030        | 0.487           | -0.029     | 0.711           | -0.034     |
| rs806376   | 88858648 | T            | 0.309 | <i>0.002</i>    | -0.132        | <i>0.003</i>    | -0.125     | <i>0.009</i>    | -0.228     |
| rs806378   | 88859551 | T            | 0.090 | 0.869           | -0.012        | 0.874           | -0.011     | 0.356           | 0.157      |
| rs2023239  | 88860482 | C            | 0.367 | 0.253           | 0.046         | 0.263           | 0.044      | 0.137           | 0.126      |
| rs1535255  | 88861208 | G            | 0.273 | 0.636           | 0.023         | 0.642           | 0.022      | 0.623           | 0.049      |
| rs806379   | 88861267 | A            | 0.471 | <i>0.037</i>    | -0.087        | <i>0.040</i>    | -0.085     | 0.059           | -0.164     |
| rs9444584  | 88862559 | C            | 0.444 | <i>0.007</i>    | -0.108        | <i>0.008</i>    | -0.104     | <i>0.005</i>    | -0.221     |
| rs806380   | 88864653 | G            | 0.191 | 0.805           | -0.014        | 0.804           | -0.014     | 0.557           | -0.065     |
| rs806381   | 88865901 | G            | 0.330 | 0.135           | 0.071         | 0.142           | 0.068      | 0.074           | 0.170      |
| rs12528858 | 88867488 | G            | 0.025 | 0.786           | 0.035         | 0.800           | 0.031      | 0.072           | 0.572      |
| rs12205430 | 88867925 | C            | 0.053 | 0.086           | -0.176        | 0.102           | -0.159     | 0.281           | -0.254     |
| rs6933128  | 88868830 | A            | 0.165 | 0.293           | 0.067         | 0.273           | 0.072      | 0.243           | 0.142      |
| rs6454673  | 88871049 | A            | 0.313 | <i>0.032</i>    | 0.104         | <i>0.032</i>    | 0.103      | <i>0.029</i>    | 0.209      |
| rs9353526  | 88876576 | T            | 0.256 | <i>0.002</i>    | -0.153        | <i>0.003</i>    | -0.144     | <i>0.002</i>    | -0.306     |
| rs9362466  | 88876581 | T            | 0.258 | <i>0.003</i>    | -0.146        | <i>0.004</i>    | -0.137     | <i>0.002</i>    | -0.301     |
| rs2180619  | 88877952 | A            | 0.256 | <b>1.53E-03</b> | -0.158        | <i>0.002</i>    | -0.147     | <b>1.70E-03</b> | -0.309     |

Notes: (1) MAF = minor allele frequency; (2) Nominal significances given in italic ( $p < 0.05$ ); (3) Bonferroni correction significances given in bold ( $p < 1.9E-03$ ).

**Supplemental Table S3: Statistical results for association analysis with Conscientiousness**

| SNP ID     | Position | Minor allele | MAF   | SNPTEST         |               |                 |            | PLINK           |            |
|------------|----------|--------------|-------|-----------------|---------------|-----------------|------------|-----------------|------------|
|            |          |              |       | Expected P      | Expected Beta | Score P         | Score Beta | Plink P         | Plink Beta |
| rs806366   | 88847589 | C            | 0.186 | 0.303           | -0.061        | 0.287           | -0.064     | 0.742           | -0.045     |
| rs806368   | 88850100 | C            | 0.210 | 0.294           | -0.051        | 0.306           | -0.049     | 0.605           | -0.059     |
| rs12720071 | 88851181 | C            | 0.151 | 0.073           | 0.109         | 0.070           | 0.111      | 0.596           | 0.080      |
| rs4707436  | 88851751 | A            | 0.382 | 0.959           | 0.002         | 0.958           | 0.002      | 0.519           | 0.060      |
| rs1049353  | 88853635 | T            | 0.058 | 0.239           | -0.108        | 0.285           | -0.089     | 0.400           | -0.200     |
| rs806369   | 88856178 | T            | 0.139 | <i>0.013</i>    | -0.170        | <i>7.94E-03</i> | -0.195     | 0.147           | 0.239      |
| rs806370   | 88856331 | T            | 0.192 | 0.150           | -0.073        | 0.154           | -0.071     | 0.757           | -0.037     |
| rs806371   | 88856363 | G            | 0.331 | <i>0.044</i>    | -0.088        | <i>0.039</i>    | -0.093     | 0.162           | -0.137     |
| rs806372   | 88856563 | C            | 0.192 | 0.151           | -0.073        | 0.155           | -0.071     | 0.709           | -0.045     |
| rs806373   | 88856916 | A            | 0.448 | 0.402           | -0.036        | 0.393           | -0.037     | 0.586           | 0.054      |
| rs806374   | 88857320 | C            | 0.485 | 0.246           | -0.050        | 0.233           | -0.052     | 0.946           | -0.007     |
| rs806376   | 88858648 | T            | 0.309 | 0.174           | -0.059        | 0.167           | -0.060     | 0.401           | -0.080     |
| rs806378   | 88859551 | T            | 0.090 | 0.962           | 0.004         | 0.962           | 0.004      | 0.920           | -0.019     |
| rs2023239  | 88860482 | C            | 0.367 | 0.896           | 0.005         | 0.894           | 0.005      | 0.122           | 0.144      |
| rs1535255  | 88861208 | G            | 0.273 | 0.373           | -0.043        | 0.353           | -0.046     | 0.915           | -0.012     |
| rs806379   | 88861267 | A            | 0.471 | 0.851           | -0.008        | 0.847           | -0.008     | 0.612           | -0.048     |
| rs9444584  | 88862559 | C            | 0.444 | 0.351           | -0.037        | 0.345           | -0.038     | 0.298           | -0.091     |
| rs806380   | 88864653 | G            | 0.191 | 0.471           | -0.040        | 0.456           | -0.043     | 0.397           | -0.105     |
| rs806381   | 88865901 | G            | 0.330 | 0.330           | 0.046         | 0.316           | 0.049      | 0.159           | 0.147      |
| rs12528858 | 88867488 | G            | 0.025 | 0.763           | 0.039         | 0.770           | 0.037      | 0.140           | 0.521      |
| rs12205430 | 88867925 | C            | 0.053 | 0.279           | -0.111        | 0.236           | -0.132     | 0.584           | -0.143     |
| rs6933128  | 88868830 | A            | 0.165 | 0.394           | 0.054         | 0.342           | 0.067      | 0.247           | 0.155      |
| rs6454673  | 88871049 | A            | 0.313 | 0.256           | 0.055         | 0.238           | 0.059      | 0.218           | 0.130      |
| rs9353526  | 88876576 | T            | 0.256 | <b>9.97E-04</b> | -0.164        | <b>7.08E-04</b> | -0.173     | <b>9.66E-05</b> | -0.424     |
| rs9362466  | 88876581 | T            | 0.258 | <b>1.36E-03</b> | -0.159        | <b>9.99E-04</b> | -0.168     | <b>1.74E-04</b> | -0.408     |

|           |          |   |       |                 |        |                 |        |                 |        |
|-----------|----------|---|-------|-----------------|--------|-----------------|--------|-----------------|--------|
| rs2180619 | 88877952 | A | 0.256 | <b>3.01E-04</b> | -0.180 | <b>2.20E-04</b> | -0.188 | <b>1.84E-05</b> | -0.464 |
|-----------|----------|---|-------|-----------------|--------|-----------------|--------|-----------------|--------|

Notes: (1) MAF = minor allele frequency; (2) Nominal significances given in italic ( $p < 0.05$ ); (3) Bonferroni correction significances given in bold ( $p < 1.9E-03$ ).

**Supplemental Table S4: Statistical results for association analysis with Openness**

| SNP ID     | Position | Minor allele | MAF   | SNPTEST      |               |              |            | PLINK        |            |
|------------|----------|--------------|-------|--------------|---------------|--------------|------------|--------------|------------|
|            |          |              |       | Expected P   | Expected Beta | Score P      | Score Beta | Plink P      | Plink Beta |
| rs806366   | 88847589 | C            | 0.186 | 0.573        | 0.033         | 0.571        | 0.033      | 0.936        | -0.008     |
| rs806368   | 88850100 | C            | 0.210 | <i>0.021</i> | -0.113        | <i>0.028</i> | -0.102     | 0.076        | -0.147     |
| rs12720071 | 88851181 | C            | 0.151 | 0.466        | 0.044         | 0.464        | 0.044      | 0.622        | 0.054      |
| rs4707436  | 88851751 | A            | 0.382 | 0.467        | 0.030         | 0.463        | 0.031      | 0.538        | 0.042      |
| rs1049353  | 88853635 | T            | 0.058 | 0.629        | 0.045         | 0.659        | 0.037      | 0.525        | 0.109      |
| rs806369   | 88856178 | T            | 0.139 | 0.193        | -0.089        | 0.173        | -0.098     | 0.597        | -0.063     |
| rs806370   | 88856331 | T            | 0.192 | <i>0.017</i> | -0.120        | <i>0.023</i> | -0.110     | 0.085        | -0.151     |
| rs806371   | 88856363 | G            | 0.331 | <i>0.018</i> | -0.104        | <i>0.019</i> | -0.102     | <i>0.029</i> | -0.155     |
| rs806372   | 88856563 | C            | 0.192 | <i>0.017</i> | -0.121        | <i>0.022</i> | -0.110     | 0.086        | -0.151     |
| rs806373   | 88856916 | A            | 0.448 | 0.447        | -0.033        | 0.450        | -0.032     | 0.888        | -0.010     |
| rs806374   | 88857320 | C            | 0.485 | 0.147        | -0.062        | 0.143        | -0.063     | 0.267        | -0.081     |
| rs806376   | 88858648 | T            | 0.309 | 0.084        | -0.075        | 0.075        | -0.079     | 0.122        | -0.106     |
| rs806378   | 88859551 | T            | 0.090 | 0.665        | -0.033        | 0.686        | -0.028     | 0.627        | -0.066     |
| rs2023239  | 88860482 | C            | 0.367 | 0.534        | 0.025         | 0.536        | 0.025      | 0.220        | 0.082      |
| rs1535255  | 88861208 | G            | 0.273 | 0.903        | 0.006         | 0.902        | 0.006      | 0.545        | 0.048      |
| rs806379   | 88861267 | A            | 0.471 | 0.432        | -0.033        | 0.422        | -0.034     | 0.629        | -0.034     |
| rs9444584  | 88862559 | C            | 0.444 | <i>0.023</i> | -0.091        | <i>0.020</i> | -0.095     | 0.092        | -0.107     |
| rs806380   | 88864653 | G            | 0.191 | 0.310        | -0.057        | 0.335        | -0.051     | 0.122        | -0.139     |
| rs806381   | 88865901 | G            | 0.330 | 0.158        | 0.067         | 0.163        | 0.065      | <i>0.032</i> | 0.164      |
| rs12528858 | 88867488 | G            | 0.025 | 0.785        | -0.035        | 0.810        | -0.027     | 0.335        | 0.245      |
| rs12205430 | 88867925 | C            | 0.053 | 0.301        | -0.106        | 0.336        | -0.091     | 0.240        | -0.222     |
| rs6933128  | 88868830 | A            | 0.165 | 0.774        | 0.018         | 0.775        | 0.018      | 0.803        | 0.024      |
| rs6454673  | 88871049 | A            | 0.313 | 0.212        | 0.060         | 0.208        | 0.062      | 0.142        | 0.113      |

|           |          |   |       |       |        |       |        |       |        |
|-----------|----------|---|-------|-------|--------|-------|--------|-------|--------|
| rs9353526 | 88876576 | T | 0.256 | 0.060 | -0.094 | 0.059 | -0.094 | 0.079 | -0.139 |
| rs9362466 | 88876581 | T | 0.258 | 0.072 | -0.089 | 0.071 | -0.090 | 0.067 | -0.144 |
| rs2180619 | 88877952 | A | 0.256 | 0.080 | -0.087 | 0.079 | -0.088 | 0.091 | -0.133 |

Notes: (1) MAF = minor allele frequency; (2) Nominal significances given in *italic* ( $p < 0.05$ ); (3) Bonferroni correction significances given in **bold** ( $p < 1.9E-03$ ).

**Supplemental Table S5: Statistical results for association analysis with Agreeableness**

| SNP ID     | Position | Minor allele | MAF   | SNPTEST    |               |         |            | PLINK        |            |
|------------|----------|--------------|-------|------------|---------------|---------|------------|--------------|------------|
|            |          |              |       | Expected P | Expected Beta | Score P | Score Beta | Plink P      | Plink Beta |
| rs806366   | 88847589 | C            | 0.186 | 0.652      | -0.026        | 0.658   | -0.025     | 0.912        | 0.016      |
| rs806368   | 88850100 | C            | 0.210 | 0.155      | -0.069        | 0.185   | -0.060     | <i>0.025</i> | -0.266     |
| rs12720071 | 88851181 | C            | 0.151 | 0.660      | -0.027        | 0.657   | -0.027     | 0.901        | 0.020      |
| rs4707436  | 88851751 | A            | 0.382 | 0.212      | 0.051         | 0.219   | 0.050      | 0.350        | 0.091      |
| rs1049353  | 88853635 | T            | 0.058 | 0.422      | 0.074         | 0.468   | 0.060      | 0.463        | 0.182      |
| rs806369   | 88856178 | T            | 0.139 | 0.426      | -0.054        | 0.424   | -0.055     | 0.524        | 0.110      |
| rs806370   | 88856331 | T            | 0.192 | 0.256      | -0.057        | 0.286   | -0.050     | 0.052        | -0.245     |
| rs806371   | 88856363 | G            | 0.331 | 0.645      | -0.020        | 0.656   | -0.019     | 0.676        | -0.043     |
| rs806372   | 88856563 | C            | 0.192 | 0.256      | -0.057        | 0.285   | -0.050     | 0.055        | -0.242     |
| rs806373   | 88856916 | A            | 0.448 | 0.871      | 0.007         | 0.874   | 0.007      | 0.442        | 0.080      |
| rs806374   | 88857320 | C            | 0.485 | 0.716      | -0.016        | 0.721   | -0.015     | 0.700        | -0.040     |
| rs806376   | 88858648 | T            | 0.309 | 0.695      | -0.017        | 0.704   | -0.016     | 0.346        | -0.096     |
| rs806378   | 88859551 | T            | 0.090 | 0.678      | 0.031         | 0.700   | 0.027      | 0.421        | 0.159      |
| rs2023239  | 88860482 | C            | 0.367 | 0.783      | 0.011         | 0.786   | 0.011      | 0.261        | 0.110      |
| rs1535255  | 88861208 | G            | 0.273 | 0.861      | -0.008        | 0.862   | -0.008     | 0.894        | -0.015     |
| rs806379   | 88861267 | A            | 0.471 | 0.703      | -0.016        | 0.710   | -0.015     | 0.160        | -0.140     |
| rs9444584  | 88862559 | C            | 0.444 | 0.805      | -0.010        | 0.809   | -0.009     | 0.332        | -0.090     |
| rs806380   | 88864653 | G            | 0.191 | 0.558      | -0.033        | 0.571   | -0.030     | 0.251        | -0.149     |
| rs806381   | 88865901 | G            | 0.330 | 0.783      | 0.013         | 0.786   | 0.013      | 0.499        | 0.074      |
| rs12528858 | 88867488 | G            | 0.025 | 0.190      | 0.170         | 0.227   | 0.144      | 0.087        | 0.630      |
| rs12205430 | 88867925 | C            | 0.053 | 0.306      | -0.104        | 0.344   | -0.089     | 0.772        | -0.079     |



|           |          |   |       |              |        |       |        |              |        |
|-----------|----------|---|-------|--------------|--------|-------|--------|--------------|--------|
| rs6933128 | 88868830 | A | 0.165 | 0.845        | -0.012 | 0.841 | -0.013 | 0.906        | 0.017  |
| rs6454673 | 88871049 | A | 0.313 | 0.563        | 0.028  | 0.564 | 0.028  | 0.298        | 0.115  |
| rs9353526 | 88876576 | T | 0.256 | 0.058        | -0.094 | 0.072 | -0.084 | <i>0.018</i> | -0.272 |
| rs9362466 | 88876581 | T | 0.258 | 0.052        | -0.096 | 0.066 | -0.086 | <i>0.019</i> | -0.269 |
| rs2180619 | 88877952 | A | 0.256 | <i>0.045</i> | -0.100 | 0.058 | -0.089 | <i>0.007</i> | -0.311 |

Notes: (1) MAF = minor allele frequency; P = P value; (2) Nominal significances given in italic ( $p < 0.05$ ); (3) Bonferroni correction significances given in bold ( $p < 1.9E-03$ ).

**Supplemental Table S6: Statistical results for association analysis with Neuroticism**

| SNP ID     | Position | Minor allele | MAF   | SNPTEST    |               |         |            | PLINK   |            |
|------------|----------|--------------|-------|------------|---------------|---------|------------|---------|------------|
|            |          |              |       | Expected P | Expected Beta | Score P | Score Beta | Plink P | Plink Beta |
| rs806366   | 88847589 | C            | 0.186 | 0.921      | 0.006         | 0.920   | 0.006      | 0.553   | -0.081     |
| rs806368   | 88850100 | C            | 0.210 | 0.484      | -0.034        | 0.497   | -0.032     | 0.587   | -0.061     |
| rs12720071 | 88851181 | C            | 0.151 | 0.444      | 0.046         | 0.440   | 0.047      | 0.811   | -0.036     |
| rs4707436  | 88851751 | A            | 0.382 | 0.503      | -0.028        | 0.508   | -0.027     | 0.130   | -0.142     |
| rs1049353  | 88853635 | T            | 0.058 | 0.379      | 0.081         | 0.406   | 0.072      | 0.746   | 0.077      |
| rs806369   | 88856178 | T            | 0.139 | 0.611      | 0.035         | 0.597   | 0.038      | 0.940   | 0.012      |
| rs806370   | 88856331 | T            | 0.192 | 0.402      | -0.042        | 0.412   | -0.041     | 0.468   | -0.087     |
| rs806371   | 88856363 | G            | 0.331 | 0.619      | -0.022        | 0.624   | -0.021     | 0.730   | -0.034     |
| rs806372   | 88856563 | C            | 0.192 | 0.401      | -0.043        | 0.410   | -0.041     | 0.480   | -0.085     |
| rs806373   | 88856916 | A            | 0.448 | 0.880      | 0.006         | 0.881   | 0.006      | 0.372   | 0.089      |
| rs806374   | 88857320 | C            | 0.485 | 0.711      | 0.016         | 0.706   | 0.016      | 0.569   | 0.057      |
| rs806376   | 88858648 | T            | 0.309 | 0.849      | 0.008         | 0.852   | 0.008      | 0.699   | 0.038      |
| rs806378   | 88859551 | T            | 0.090 | 0.514      | -0.049        | 0.514   | -0.049     | 0.801   | -0.047     |
| rs2023239  | 88860482 | C            | 0.367 | 0.941      | 0.003         | 0.940   | 0.003      | 0.694   | 0.036      |
| rs1535255  | 88861208 | G            | 0.273 | 0.717      | -0.017        | 0.714   | -0.018     | 0.879   | -0.017     |
| rs806379   | 88861267 | A            | 0.471 | 0.874      | 0.007         | 0.875   | 0.007      | 0.749   | -0.030     |
| rs9444584  | 88862559 | C            | 0.444 | 0.793      | 0.010         | 0.795   | 0.010      | 0.940   | 0.007      |
| rs806380   | 88864653 | G            | 0.191 | 0.745      | 0.018         | 0.745   | 0.018      | 0.993   | -0.001     |
| rs806381   | 88865901 | G            | 0.330 | 0.905      | 0.006         | 0.903   | 0.006      | 0.647   | -0.047     |

|            |          |   |       |       |        |       |        |       |        |
|------------|----------|---|-------|-------|--------|-------|--------|-------|--------|
| rs12528858 | 88867488 | G | 0.025 | 0.566 | -0.075 | 0.572 | -0.072 | 0.410 | -0.290 |
| rs12205430 | 88867925 | C | 0.053 | 0.769 | -0.030 | 0.766 | -0.031 | 0.893 | 0.035  |
| rs6933128  | 88868830 | A | 0.165 | 0.876 | -0.010 | 0.871 | -0.011 | 0.964 | 0.006  |
| rs6454673  | 88871049 | A | 0.313 | 0.834 | -0.010 | 0.830 | -0.011 | 0.758 | 0.032  |
| rs9353526  | 88876576 | T | 0.256 | 0.309 | 0.051  | 0.320 | 0.048  | 0.084 | 0.189  |
| rs9362466  | 88876581 | T | 0.258 | 0.342 | 0.047  | 0.351 | 0.045  | 0.085 | 0.189  |
| rs2180619  | 88877952 | A | 0.256 | 0.266 | 0.055  | 0.279 | 0.052  | 0.106 | 0.178  |

Notes: (1)MAF = minor allele frequency; (2) Nominal significances given in italic ( $p < 0.05$ ); (3) Bonferroni correction significances given in bold ( $p < 1.9E-03$ ).

**Supplemental Table S7: Identified SNPs associated with five dimensions of personality traits**

| SNP ID     | Position | Minor allele | MAF   | Extraversion P-value | Conscientiousness P-value | Openness P-value | Agreeableness P-value | Neuroticism P-value | literature evidence   | SNP priority score |
|------------|----------|--------------|-------|----------------------|---------------------------|------------------|-----------------------|---------------------|-----------------------|--------------------|
| rs806368   | 88850100 | C            | 0.210 | <i>0.002</i>         | 0.294                     | <i>0.021</i>     | 0.155                 | 0.484               | Ehlers <i>et al</i>   | 5                  |
| rs12720071 | 88851181 | C            | 0.151 | <i>0.028</i>         | 0.073                     | 0.466            | 0.660                 | 0.444               | NULL                  | 2                  |
| rs806369   | 88856178 | T            | 0.139 | <i>0.016</i>         | <i>0.013</i>              | 0.193            | 0.426                 | 0.611               | NULL                  | 2                  |
| rs806370   | 88856331 | T            | 0.192 | <b>2.68E-04</b>      | 0.150                     | <i>0.017</i>     | 0.256                 | 0.402               | NULL                  | 2                  |
| rs806371   | 88856363 | G            | 0.331 | <i>0.013</i>         | <i>0.044</i>              | <i>0.018</i>     | 0.645                 | 0.619               | Mitjans <i>et al</i>  | 4                  |
| rs806372   | 88856563 | C            | 0.192 | <b>2.66E-04</b>      | 0.151                     | <i>0.017</i>     | 0.256                 | 0.401               | NULL                  | 2                  |
| rs806376   | 88858648 | T            | 0.309 | <i>0.002</i>         | 0.174                     | 0.084            | 0.695                 | 0.849               | NULL                  | 1                  |
| rs806379   | 88861267 | A            | 0.471 | 0.037                | 0.851                     | 0.432            | 0.703                 | 0.874               | Juhasz <i>et al</i>   | 2                  |
| rs9444584  | 88862559 | C            | 0.444 | 0.007                | 0.351                     | <i>0.023</i>     | 0.805                 | 0.793               | NULL                  | 2                  |
| rs806381   | 88865901 | G            | 0.330 | 0.135                | 0.330                     | 0.158            | 0.783                 | 0.905               | NULL                  | 1                  |
| rs6454673  | 88871049 | A            | 0.313 | 0.032                | 0.256                     | 0.212            | 0.563                 | 0.834               | NULL                  | 1                  |
| rs9353526  | 88876576 | T            | 0.256 | <i>0.002</i>         | <b>9.97E-04</b>           | 0.060            | 0.058                 | 0.309               | NULL                  | 3                  |
| rs9362466  | 88876581 | T            | 0.258 | <i>0.003</i>         | <b>1.36E-03</b>           | 0.072            | 0.052                 | 0.342               | NULL                  | 3                  |
| rs2180619  | 88877952 | A            | 0.256 | <b>1.53E-03</b>      | <b>3.01E-04</b>           | 0.080            | <i>0.045</i>          | 0.266               | Heitland <i>et al</i> | 5                  |

Notes: (1) MAF = minor allele frequency; (2) Nominal significances given in italic ( $p < 0.05$ ); (3) Bonferroni correction significances given in bold ( $p < 1.9E-03$ ).

**Supplemental Table S8: Allele frequency comparison among our African-American population, 1000Genome African population and 1000Genome European population.**

| SNP ID     | Position | Allele | African-American | 1000G AFR | 1000G EUR |
|------------|----------|--------|------------------|-----------|-----------|
| rs806366   | 88847589 | C      | 0.186            | 0.208     | 0.513     |
| rs806368   | 88850100 | C      | 0.210            | 0.076     | 0.218     |
| rs12720071 | 88851181 | C      | 0.151            | 0.177     | 0.098     |
| rs4707436  | 88851751 | A      | 0.382            | 0.417     | 0.264     |
| rs1049353  | 88853635 | T      | 0.058            | 0.029     | 0.258     |
| rs806369   | 88856178 | T      | 0.139            | 0.124     | 0.312     |
| rs2023239  | 88860482 | C      | 0.367            | 0.368     | 0.157     |
| rs1535255  | 88861208 | G      | 0.273            | 0.372     | 0.157     |
| rs806379   | 88861267 | A      | 0.471            | 0.442     | 0.554     |

Note: (1) 1000G AFR=1000Genome African population; (2)1000G EUR=1000Genome European population.
